# Supplementary material for: Putative Mixotrophic Nitrifying-Denitrifying Gammaproteobacteria Implicated in Nitrogen Cycling Within the Ammonia/Oxygen Transition Zone of an Oil Sands Pit Lake
Source: Front Microbiol. 2019 Oct 24;10:2435. doi: 10.3389/fmicb.2019.02435 (PMC6824324; doi:10.3389/fmicb.2019.02435)
Supplement: Supplementary file 1 [file Table_1.XLSX]

## Sheet: Table S1
Table S1
August 18-20th, 2015
Depths (m)	Temperature (˚C)	pH	Dissolved oxygen (%)	Dissolved oxygen (µM)	Conductivity (µs/cm)	Ammonia (µM)	Nitrite (µM)	Nitrate (µM)	Sulfate (µM)	Sulfide (µM)	Methane (µM)	Fe(II) (µM)	DOC (mg/L)	TOC (mg/L)	16S rRNA amplicon sequencing	Shotgun sequencing
0	19.76 ± 1.25	8.33 ± 0.01	62.2 ± 4.8	173.28 ± 14.36	2763.5 ± 19.0	34.71*	5.21*	59.26*	NA	NA	NA	NA	NA	NA
0.5	19.15 ± 0.81	8.31 ± 0.03	55.2 ± 6.6	157.60 ± 16.24	2765.3 ± 16.4	NA	NA	NA	NA	NA	NA	NA	NA	NA
1	18.92 ± 0.44	8.30 ± 0.02	53.1 ± 4.8	152.60 ± 12.48	2765.3 ± 16.4	NA	NA	NA	NA	NA	NA	NA	NA	NA
1.5	18.85 ± 0.31	8.30 ± 0.02	52.3 ± 3.8	150.63 ± 10.04	2764.3 ± 18.5	NA	NA	NA	2604.48	0	0.88	1.04	58.0667	354	X	X
2	18.75 ± 0.22	8.30 ± 0.02	51.3 ± 2.8	148.13 ± 7.51	2764.0 ± 16.9	34.12*	5.28*	59.26*	NA	NA	NA	NA	NA	NA
2.5	18.70 ± 0.17	8.30 ± 0.02	50.6 ± 2.1	146.35 ± 5.81	2764.3 ± 20.0	NA	NA	NA	NA	NA	NA	NA	NA	NA
3	18.70 ± 0.16	8.30 ± 0.02	50.5 ± 2.0	145.83 ± 5.46	2764.0 ± 19.3	NA	NA	NA	NA	NA	NA	NA	NA	NA
3.5	18.70 ± 0.16	8.30 ± 0.02	50.4 ± 1.9	145.73 ± 5.29	2764.3 ± 15.1	NA	NA	NA	NA	NA	NA	NA	NA	NA
4	18.70 ± 0.17	8.30 ± 0.02	50.3 ± 2.1	145.63 ± 5.65	2764.3 ± 12.9	35.29*	4.78*	59.97*	NA	NA	NA	NA	NA	NA
4.5	18.68 ± 0.18	8.29 ± 0.03	50.1 ± 2.2	144.79 ± 5.95	2764.7 ± 5.1	NA	NA	NA	NA	NA	NA	NA	NA	NA
5	18.68 ± 0.18	8.29 ± 0.03	49.8 ± 2.2	144.17 ± 5.82	2763.7 ± 7.0	NA	NA	NA	NA	NA	NA	NA	NA	NA
5.5	18.64 ± 0.17	8.29 ± 0.03	49.0 ± 1.3	141.98 ± 3.37	2765.0 ± 16.1	NA	NA	NA	NA	NA	NA	NA	NA	NA
6	18.55 ± 0.19	8.28 ± 0.03	46.7 ± 3.5	135.21 ± 9.71	2766.3 ± 18.6	45.29*	5.14*	59.97*	NA	NA	NA	NA	NA	NA
6.5	18.23 ± 0.46	8.25 ± 0.06	34.4 ± 14.1	100.21 ± 40.42	2773.3 ± 20.7	NA	NA	NA	1787.44	0	1.3	0.49	53.65	302.9	X	X
7	17.31 ± 0.62	8.14 ± 0.09	16.8 ± 19.5	49.27 ± 57.00	2795.3 ± 7.5	NA	NA	NA	NA	NA	NA	NA	NA	NA
7.5	15.88 ± 0.51	8.00 ± 0.03	4.1 ± 0.9	12.50 ± 2.72	2832.7 ± 6.2	NA	NA	NA	2366.44	0	2.86	NA	43.02	457.5
8	15.20 ± 0.41	7.95 ± 0.02	3.2 ± 0.3	10.10 ± 1.00	2842.3 ± 8.7	70.59*	10.71*	16.42*	NA	NA	NA	NA	NA	NA
8.5	14.79 ± 0.49	7.91 ± 0.03	2.9 ± 0.4	8.96 ± 1.26	2851.0 ± 12.7	NA	NA	NA	1971.59	1.23581	62.17	0.31	56.5933	324.867	X	X
9	13.57	7.51	2.2	6.88	2421	76.47*	3.14*	4.28*	NA	NA	NA	NA	NA	NA
9.5**	NA	7.61#	NA	NA	NA	713.942	0	0.49996	156.152	2.55715	NA	NA	NA	NA
10**	NA	7.71	NA	NA	NA	713.942	0	0.338683	124.922	0.873172	NA	NA	NA	NA
10.5**	NA	7.34	NA	NA	NA	1042.36	0	0	60.3789	0.935541	NA	NA	NA	NA
11**	NA	7.29	NA	NA	NA	1092.33	0	1.32248	61.4199	1.09146	NA	NA	NA	NA
	*Data from Hatfield consultants, measured on August 10th 2015 at the same location
	**Measued on August 5th 2015
	NA: Not Analyzed
August 2-5th, 2016
Depths (m)	Temperature (˚C)	pH	Dissolved oxygen (%)	Dissolved oxygen (µM)	Conductivity (µs/cm)	Ammonia (µM)	Nitrite (µM)	Nitrate (µM)	Sulfate (µM)	Sulfide (µM)	Methane (µM)	Fe(II) (µM)	DOC (mg/L)	TOC (mg/L)	16S rRNA amplicon sequencing	Shotgun sequencing
0	20.68 ± 0.38	8.30 ± 0.02	75.5 ± 3.5	208.44 ± 6.77	2796.8 ± 5.7	14.2	1.87	24.19	2338.2	0	NA	0.17	NA	NA	X
0.5	20.39 ± 0.18	8.32 ± 0.01	72.4 ± 1.5	202.19 ± 3.60	2797.3 ± 3.3	NA	NA	NA	NA	NA	NA	NA	NA	NA
1	20.24 ± 0.17	8.32 ± 0.01	71.3 ± 0.9	199.53 ± 1.95	2796.3 ± 2.9	NA	NA	NA	NA	NA	NA	NA	NA	NA
1.5	20.33 ± 0.17	8.32 ± 0.01	71.3 ± 0.9	199.69 ± 1.90	2794.8 ± 3.2	10.47	2.06	30.74	2282.65	0	0.21	0	NA	NA	X	X
2	20.19 ± 0.08	8.31 ± 0.01	70.4 ± 0.9	197.50 ± 2.27	2795.0 ± 2.9	NA	NA	NA	NA	NA	NA	NA	NA	NA
2.5	20.12 ± 0.16	8.31 ± 0.01	70.1 ± 0.7	196.64 ± 1.97	2795.8 ± 2.2	NA	NA	NA	NA	NA	NA	NA	NA	NA
3	20.03 ± 0.32	8.31 ± 0.01	68.9 ± 2.6	193.91 ± 5.96	2796.3 ± 2.2	NA	NA	NA	NA	NA	NA	NA	NA	NA
3.5	19.93 ± 0.47	8.30 ± 0.02	73.0 ± 10.5	191.88 ± 4.89	2797.0 ± 0.8	NA	NA	NA	NA	NA	NA	NA	NA	NA
4	19.71 ± 0.38	8.29 ± 0.02	64.2 ± 3.2	183.36 ± 7.53	2799.5 ± 2.6	NA	NA	NA	NA	NA	NA	NA	NA	NA
4.5	19.20 ± 0.14	8.26 ± 0.01	57.1 ± 2.1	163.20 ± 5.86	2808.3 ± 5.4	10.93	2.59	22.3	1515.5	0	0.31	0.12	NA	NA	X
5	18.78 ± 0.10	8.23 ± 0.01	48.9 ± 4.5	141.02 ± 12.57	2810.0 ± 2.9	NA	NA	NA	NA	NA	NA	NA	NA	NA
5.5	18.54 ± 0.14	8.21 ± 0.01	45.6 ± 4.0	131.80 ± 11.35	2812.5 ± 2.6	NA	NA	NA	NA	NA	NA	NA	NA	NA
6	17.38 ± 0.79	8.16 ± 0.04	23.5 ± 9.3	69.53 ± 26.21	2841.8 ± 15.9	5.2	5.95	35.51	2016.8	0.205	0.13	0.22	NA	NA	X
6.5	16.26 ± 0.39	8.02 ± 0.01	7.7 ± 2.8	22.42 ± 8.34	2864.5 ± 11.5	15.93	10.26	39.97	1824.1	0	0.24	0	NA	NA	X	X
7	15.44 ± 0.51	7.99 ± 0.03	4.4 ± 1.0	13.36 ± 2.97	2877.8 ± 13.7	NA	NA	NA	NA	NA	NA	NA	NA	NA
7.5	14.58 ± 0.40	7.94 ± 0.03	3.7 ± 0.3	11.72 ± 1.04	2892.8 ± 5.4	25.96	9.65	36.99	1832.04	0	18.11	0.22	NA	NA	X	X
8	14.16 ± 0.15	7.93 ± 0.01	3.4 ± 0.5	10.00 ± 2.53	2900.0 ± 6.3	NA	NA	NA	NA	NA	NA	NA	NA	NA
8.5	13.96 ± 0.06	7.92 ± 0.01	3.0 ± 0.3	9.53 ± 0.83	2901.8 ± 2.5	NA	NA	NA	NA	NA	NA	NA	NA	NA
9	13.74 ± 0.16	7.90 ± 0.01	2.8 ± 0.1	8.98 ± 0.53	2905.3 ± 3.9	NA	NA	NA	NA	NA	NA	NA	NA	NA
9.3	NA	NA	NA	NA	2421	29.38	2.87	17.04	1795	0.84	65.84	0.33	NA	NA	X	X
9.5*	16.2	7.91	NA	NA	2960	239.171	0	0	NA	1.19	160.562	NA	55.59	NA
10*	14.8	7.61	NA	NA	3830	609.706	0	0	NA	1.59	1986.16	NA	NA	NA
10.5*	13.9	7.35	NA	NA	3500	799.615	0	0	NA	1.31	2547.91	NA	71.18	NA
11*	12.5	7.33	NA	NA	3560	906.706	0	0	NA	1.62	3641.02	NA	NA	NA
	*Measued on August 13th 2016
	NA: Not Analyzed

## Sheet: Table S2
Table S2
Microbial order	2015 (water)			2016 (water)							2016 (FFT)
	1.5 m	6.5 m	8.5 m	0 m	1.5 m	4.5 m	6.0 m	6.5 m	7.5 m	9.3 m	9.5 m	10.5 m
Gammaproteobacteria
Betaproteobacteriales	19.63	20.34	20.1	15.93	15.49	13.18	11.05	15.1	14.24	14.85	12.38	5.35
(Nitrosomonadaceae)	0.3	0.18	0.07	0.95	0.18	0.31	0.85	0.49	0.06	0.04	0.38	0.18
MBAE14	1.25	3.37	19.45	0.52	1.41	1.38	2.16	2.57	20.52	27.82	0.34	0
Methylococcales	1.34	4.4	5.69	0.33	1.34	2.99	1.44	0.74	10.24	7.21	5.71	0.9
Alteromonadales	6.94	4.81	1.76	8.06	7.67	8.44	6.46	6.93	2.13	3.05	0	0.02
Oceanospirillales	4.07	2.23	0.49	0.64	0.98	1.12	1.07	1.55	1.19	0.77	0.41	0.11
Acidiferrobacterales	1.57	1.39	0.75	0.51	0.34	0.39	0.66	1.76	1.38	0.41	0.13	0.4
Immundisolibacterales	0.64	0.78	0.69	1.86	1.64	1.25	1.07	1.34	1.92	1.83	1.86	0.7
Cellvibrionales	0.43	0.56	0.45	1.22	0.89	0.68	3.98	1.51	0.26	0.38	5.97	5.48
Alphaproteobacteria
Rhizobiales	0.19	0.24	0.36	2.24	2.13	1.11	0.97	0.19	1.05	0.86	1.25	1.2
Rickettsiales	1.5	1.61	0.66	0.14	0.62	0.22	0.15	0.16	0.04	0.03	0.03	0
Sphingomonadales	0.61	0.79	1.14	1.06	2	2.95	2.61	0.28	1.65	0.48	2.34	1.78
Deltaproteobacteria
Desulfobacterales	0.38	0.06	0.42	0	0.07	0.02	0.17	0.03	0.2	0.15	13.14	24.42
Desulfuromonadales	0.08	0.12	0.71	0	0.07	0.03	0.04	0.07	0.46	0.58	3.15	4.8
Syntrophobacterales	0.07	0.11	0.5	0	0	0	0	0.04	0	0.24	2.45	4.23
Actinobacteria
Frankiales	28.52	20.85	9.12	10.75	7.84	8.87	9.18	16.16	8.84	4.18	0.24	0.04
Micrococcales	2.65	3.38	1.31	2.72	4.88	6.45	3.1	1.63	0.91	0.6	0.33	0.44
Bifidobacteriales	0	0	0	0	0	0	0.21	0	0	4.71	0	0
Gaiellales	0.55	0.71	0.32	0.72	3.63	3.43	1.12	0.29	0.23	0.8	0.41	0.16
OPB41	0	0.01	0	0	0.02	0	0	0	0	0.1	1.36	2.27
Microtrichales	0.12	0.12	0.05	0	0.07	0.06	0.03	0.06	0.05	0.01	1.18	0.24
Bacteroidetes
Flavobacteriales	4.39	7.83	9.03	7.09	6.48	6.39	4.59	8.39	5.26	2.61	2.18	2.71
Sphingobacteriales	2.94	2.85	2.35	9.14	7.76	6.77	9.71	17.3	5.77	2.99	2.83	0.07
Cytophagales	1.5	1.33	0.8	5.59	5.49	6.73	2.3	4.17	1.53	1.66	0.13	0.04
Bacteroidales	0.16	0.29	1.48	0.02	0	0	0.19	0.01	0.89	0.31	2.71	2.68
Firmicutes
Erysipelotrichales	6.28	6.12	1.29	0.41	1.43	0.96	2.07	0.9	0.27	0.13	0.53	0.84
Clostridiales	0.02	0.05	0.18	0.45	0.05	0.39	0.3	0.04	0.05	0.19	4.15	5.74
Epsilonproteobacteria
Campylobacterales	1.46	2.63	8.24	0	0.32	0	0.18	1.77	2.96	1.89	0.312	0.07
Verrucomicrobia
Verrucomicrobiales	1.04	0.95	0.56	0.32	0.56	0.46	0.5	1.19	0.54	0.51	3.22	0.19
Opitutales	0.7	0.71	1.82	1.8	1.23	0.49	1.18	1.08	1.12	1.32	0.03	0
Acidobacteria
Blastocatellales	0.45	0.41	0.18	4.31	2.01	1.45	2.93	0.93	0.57	1.43	0.1	0.07
Tenericutes
Izimaplasmatales	0.04	0.1	0.56	0	0	0	0.02	0.02	0.02	0.29	0.02	1.22
Chloroflexi
JG30-KF-CM66	0.7	1.16	0.59	1.69	0.94	0.65	0.6	1.45	0.44	0.26	0	0
Anaerolineales	0.01	0.06	0.53	0	0	0.02	0	0	0	0.04	11.61	17.43
Others	9.47	9.45	8.35	21.53	22.46	22.81	29.11	11.85	15.21	17.27	19.118	16.22

## Sheet: Table S3
Table S3
Statistics of a reconstructed genome of BML MBAE14
Total bases	Scaffolds	Protein coding genes	tRNA	% Genome completeness	% Contaminations
3155308	18	2864	38	96.11	1.27
